# Supplementary material for: Quality-of-life endpoints in women of childbearing age with hidradenitis suppurativa: a tertiary-care-centre-based study
Source: Research Square preprint supplement (doi:10.21203/rs.3.rs-2348944/v1), 2022-12-08
Supplement: Supplementary file 1 [file 19fd7165dad6014beb85f2ca.docx]

| **Table 1. Study questionnaire** |  |
| --- | --- |
| **Eligibility criteria** | Woman, 18-49 years old  Has not entered menopause |
| **Demographic characteristics** | Date of birth, date of symptom onset, current treatment, history of biologic treatment |
| **Clinical examination** | PGAa, Hurley stage |
| **Social life** | 1. I feel stigmatized because of my disease  2. I try to hide my disease and this affects how I pick my clothes  3. My disease affects my social life and friendships |
| **Sexual life** | 4. My sexual life is impaired because of my disease  5. I feel embarrassed when removing my clothes during sexual intercourse/I don’t want to remove them  6. I have had/currently have a partner who feels uncomfortable with my skin lesions or is afraid that my disease is contagious, and therefore avoids sexual intercourse |
| **Family planning** | 7. I have decided/am seriously thinking of not having children or having less children because of my disease  8. I am afraid that my disease will have an impact on my children’s health and/or my ability to take care of them  9. I am afraid that pregnancy/the postpartum will have a negative impact on my disease  10. I am afraid that the medication I am taking will have an impact on my fertility or will harm my baby during pregnancy or lactation  11. I have faced problems with pregnancy, birth, postpartum or breastfeeding because of my disease (what kind of problems?) |
| **Working life** | 12. I am afraid I will lose my job because of my disease  13. I have been absent from work/less productive at work because of my disease  14. How many days sick leave have I taken due to my disease during the past year  15. Have I been discriminated against at work because of my disease  16. My disease has a negative impact on my income or my career |
| **Healthcare provider-backed support** | 17. I am not adequately informed about my disease  18. I have not received adequate support with/information about how to handle my disease during pregnancy and the postpartum  19. I am not adequately informed about services/support groups/support material for people with hidradenitis suppurativa |

Potential answers for questions 1-19 were yes, no, cannot recall, not applicable, except for question 18 (open-ended question). Questions were asked by a consultant dermatologist with special interest in HS. Clinical examination was performed by same consultant. aPGA: Physician Global Assessment of disease activity on a scale of 0-4
