# Supplementary material for: Quality-of-life endpoints in women of childbearing age with hidradenitis suppurativa: a tertiary-care-centre-based study
Source: Research Square preprint supplement (doi:10.21203/rs.3.rs-2348944/v1), 2022-12-08
Supplement: Supplementary file 2 [file 86dad2e202ca15248b09b97a.docx]

| **Table 2. Demographic characteristics** | |
| --- | --- |
| **Age** (years, mean, 95% CIa) | 34.95 (33.28, 36.62) |
| **Disease duration** (years, mean, 95% CI) | 12.14 (10.53, 13.75) |
| **Current treatment** (%) | No treatment 2.1 |
|  | Topical only 20.8 |
|  | Systemic antibiotic(s) 38.5 |
|  | Biologic 38.5 |
| **History of biologic treatment** (%) | 40.6 |
| **Hurley stage** (%) | Stage I 29.2 |
|  | Stage II 44.8 |
|  | Stage III 26.0 |
| **Physician’s Global Assessment** (%) | Clear skin 0 |
|  | Almost clear skin 0 |
|  | Mild disease 34.4 |
|  | Moderate disease 40.6 |
|  | Moderate-to-severe disease 19.8 |
|  | Severe disease 5.2 |

a95%CI: 95% Confidence Interval
