# Supplementary material for: Quality-of-life endpoints in women of childbearing age with hidradenitis suppurativa: a tertiary-care-centre-based study
Source: Research Square preprint supplement (doi:10.21203/rs.3.rs-2348944/v1), 2022-12-08
Supplement: Supplementary file 3 [file cf9b57e02ffdc21e578b5ba3.docx]

| **Table 3. Factors significantly increasing likelihood of answering “yes”** | | | |  |
| --- | --- | --- | --- | --- |
| **Question** | **Factor** | **Odds ratio** | **Sig. level** | **95%CI** |
| Q1 | Hurley stage | 125.035 | p<0.001 | 9.775, 1599.331 |
| Q2 | None | - | - | - |
| Q3 | Hurley stage | 33.860 | p<0.001 | 8.190, 139.984 |
| Q4 | Hurley stage | 44.135 | p<0.001 | 10.661, 182.717 |
| Q5 | Hurley stage | 44.320 | p<0.001 | 7.079-277.480 |
| Q6 | Hurley stage | 16.304 | p<0.01 | 4.449-59.746 |
| Q7 | None | - | - | - |
| Q8 | Hurley stage | 8.203 | p<0.01 | 2.711-24.821 |
| Q9 | Hurley stage | 3.935 | p=0.019 | 1.255-12.341 |
|  | Biologic treatment | 4.997 | p=0.025 | 1.229-20.317 |
| Q10 | Hurley stage | 6.082 | p=0.08 | 1.595-23.200 |
| Q11 | None | - | - | - |
| Q12 | Hurley stage | 5.195 | p=0.09 | 1.500-17.990 |
| Q13 | Hurley stage | 9.565 | p<0.001 | 3.106-29.456 |
| Q15 | Hurley stage | 4.538 | p=0.03 | 1.157-17.797 |
| Q16 | Biologic treatment | 3.254 | p=0.019 | 1.218-8.694 |
| Q17 | None | - | - | - |
| Q18 | Biologic treatment | 3.382 | p=0.05 | 1.440-7.944 |
| Q19 | Hurley stage | 5.960 | p=0.02 | 1.900-18.695 |
|  | Disease duration | 0.928 | p=0.031 | 0.867-0.993 |
|  | **Factor** | **B** | **Sig. level** | **R** |
| Q14 | Hurley stage | 5.300 | p<0.001 | 0.463 |

aQ1: Full questions available in Table 1.
